# Supplementary material for: Adult Drosophila sensory neurons specify dendritic territories independently of dendritic contacts through the Wnt5–Drl signaling pathway
Source: PubMed Central journal article supplement — Genes Dev. 2015 Aug 15;29(16):1763–75. doi: 10.1101/gad.262592.115 (PMC4561484; doi:10.1101/gad.262592.115), 2015-08-15
Supplement: supp_29.16.1763_SuppMaterial.pdf [file supp_29.16.1763_SuppMaterial.pdf]

**Supplemental Figure S1. Dendrites of v'ada neurons cover segmental boundaries in a complete and redundant manner.**

Two neighboring v'ada neurons were labeled with EGFP and mCitrine respectively by the Flybow system.

**Supplemental Figure S2. Dendritic fields of wild-type and *Wnt5* mutant v'ada neurons.**

(A, B) Dendritic fields of v'ada neurons in wild-type (A) and *Wnt5* mutant (B) abdomens.

(C, D) Quantification of the dendritic field size (C,  $p = 0.628$ ) and the field width (D,  $p = 0.434$ ) of v'ada neurons in wild-type and *Wnt5* mutants.

(E, F) Quantification of the total dendritic length (E,  $p = 0.59$ ) and the number of branch points outside of sternites (F,  $p = 0.38$ ) in wild-type and *Wnt5* mutant neurons. Error bars indicate standard error of the mean. n.s.  $> 0.05$ ; unpaired Student's *t* test.

(G, H) Quantification of the number of bristles on a sternite (G,  $p = 0.63$ ) and the size of sternites (H,  $p = 0.19$ ) in wild-type and *Wnt5* mutants. Error bars indicate standard error of the mean. n.s.  $> 0.05$ ; unpaired Student's *t* test.

(I, J) Relative position of v'ada dendrites and ECM in wild-type (I-I''') and *Wnt5* (J-J''') 5-day adults. Dendrites and ECM are visualized with *ppk*-CD4tdTom and *vkg*::GFP, respectively. Scale bar, 50  $\mu$ m. Live imaging of dendrite-ECM interaction was performed as described previously (Han et al., 2012) with modifications. Briefly, image stacks were acquired using a Leica TCS SP8 confocal microscope equipped with a 40x/1.30 NA oil objective at high resolution (1024x1024 pixel, 0.28  $\mu$ m per pixel, 0.24-0.26  $\mu$ m z step size). The image stacks were then processed using LAS AF software (Leica Microsystems) to construct x-z sections.

**Supplemental Figure S3. Generation of *Wnt5*-EGFP constructs**

(A) A schematic of the P[acman]-CH322-141N12. The genomic fragment inserted into this P[acman] vector is indicated by the black box.

(B) A strategy to generate the *Wnt5*-EGFP vector. *Wnt5*-EGFP-stop/*Kmr* cassette is introduced immediately downstream of the ATG start codon.

(C, D) Late pupal brains from control (C) and *Wnt5-EGFP* transgenic (D) flies stained with GFP antibodies. *Wnt5-EGFP* is expressed dominantly in the optic lobes. The outline of the optic lobe is highlighted with the white line. Me, medulla; MeN, medulla neurons. Scale bars, 50  $\mu\text{m}$ .

(E) *Wnt5-EGFP* expression in abdominal epithelial cells. Representative images of *Wnt5-EGFP* expression in 2-day adults (left), and 5-day adults (right) are shown. Arrowheads indicate the ventral midline. Scale bars, 100  $\mu\text{m}$ .

#### **Supplemental Figure S4. Ectopic expression of *Wnt5* restricts *C4da* dendrite growth in larval epithelial cells**

(A, B) *v'ada* dendrites in *hh*-positive epidermal cells in control (A) and *hh-Gal4 UAS-Wnt5* (B) third instar larvae. *v'ada* dendrites are labeled with *ppk-CD4tdTom* (magenta) and *hh*-positive cells are labeled with GFP (green).

(A', B') Dendrites in *hh*-positive regions.

(C) Quantification of *C4da* dendrite length in control and *Wnt5*-expressing larvae. Error bars indicate standard error of the mean. n.s. > 0.05, \* $p$  < 0.05; unpaired Student's *t* test.

(D) Expression of *drl* in the third instar larvae.

(E) *Wnt5-EGFP* expression in third instar larvae. Arrowheads indicate the soma of *v'ada* neurons. Scale bars, 100  $\mu\text{m}$  (A, E); 50  $\mu\text{m}$  (D).

#### **Supplemental Figure S5. Dendritic fields of *drl*, *Drl-2*, and *drl Drl-2* double mutant *v'ada* neurons.**

(A-D) Dendritic fields of *wild-type* (A), *drl* (B), *Drl-2* (C), and *drl Drl-2* (D) mutant *v'ada* neurons. Scale bars, 100  $\mu\text{m}$ .

(E-H) Quantification of the dendritic field area (E,  $p = 0.495$ ), the field width (F,  $p = 0.155$ ), the total dendritic length (G,  $p = 0.391$ ), and the number of branch points (H,  $p = 0.197$ ) of wild-type, *drl*, *Drl-2*, and *drl Drl-2* double mutant neurons. Error bars indicate standard error of the mean. The numbers below each bar indicate *n* values. n.s. > 0.05; one-way ANOVA.

(I, J) Quantification of the distance from ventral midline to the dendritic branch terminals (I) and the total dendritic length within single sternites (J) in *v'ada* neurons that express *UAS-drl-shRNA*, *UAS-Drl2-shRNA*, or both

*UAS-drl-shRNA* and *UAS-Drl2-shRNA*. *UAS-mCherry-shRNA* was used as a control. One-way ANOVA followed by Dunnett's test. \* $p < 0.05$ , \*\* $p < 0.01$ . All shRNA lines were obtained from the TRiP collection at Harvard Medical School: *mCherry-shRNA* (#35785), *drl-shRNA* (#29602), and *Drl-2-shRNA* (#25961).

**Supplemental Figure S6. Drl and Drl-2 receptors function cell autonomously in v'ada neurons to specify ventral boundary**

(A-D) Ventral views of v'ada dendrites in wild-type control (A), *drl Drl-2* double mutants (B), *drl Drl-2* double mutants with *UAS-drl* transgene (C), and *drl Drl-2* double mutants with *UAS-Drl2* transgene (D). Scale bars, 50  $\mu\text{m}$ .

**Supplemental Figure S7. Localization pattern of Drl::GFP protein in v'ada dendrites**

(A, B) A live confocal image of a v'ada neuron labeled with mCD8RFP at 1-day adult (A) and a schematic trace of a primary dendrite (B). Scale bar, 50  $\mu\text{m}$ . The primary dendrite was divided into ten parts along proximal-distal axis for quantification of Drl::GFP distribution.

(C, D) A representative image of Drl::GFP localization in the medial part (C) and the distal (D) part of the primary dendrite. Scale bar, 10  $\mu\text{m}$ .

(E) Quantification of Drl::GFP intensity in primary dendrites. Error bars indicate standard error of the mean ( $n = 4$ ).

**Supplemental Figure S8. Dendritic fields of trio mutant v'ada neurons**

(A, B) Quantification of the dendritic field size (A) and the field width (B) of v'ada neurons in wild-type control, *trio*<sup>E4.1</sup>, and *trio*<sup>E4.1</sup> with *UAS-trio* transgene MARCM clones.

(C, D) Quantification of the total dendritic length (C) and the number of branch points outside of sternites (D). Error bars indicate standard error of the mean. n.s.  $> 0.05$ , \* $p < 0.05$ ; One-way ANOVA followed by Tukey's HSD test.

**Supplemental Figure S9. Genetic interactions between trio and Wnt5/drl genes**

(A-F) Ventral boundary phenotypes in the indicated genotypes. Bottoms are

tracings of the top images. Scale bars, 50  $\mu\text{m}$ .

(G, H) Quantification of the distance from ventral midline to branch terminals (G) and the total dendritic length within single sternites (H). Error bars indicate standard error of the mean. The numbers below each bar indicate n values. \* $p < 0.05$ , \*\* $p < 0.01$ .

### **Supplemental Figure S10. The effects of the dominant-negative Rho1 and Rac1 in the ventral boundary formation**

(A-C) Rho1-DN, but not Rac1-DN, affects the ventral boundaries of v'ada dendrites. For temporal expression of the dominant negative Rho1 (Rho1-N19) or Rac1 (Rac1-N17) in the pupal/adult stage, we utilized the Flip-out technique (see Experimental procedures). Bottoms are tracings of the top images. Scale bars, 50  $\mu\text{m}$ .

(D, E) Quantification of the distance from the ventral midline to branch terminals (D) and the total dendritic length within single sternites (E). Error bars indicate standard error of the mean. The numbers below each bar indicate n values. \* $p < 0.05$ . In D, significance compared to control, *control* versus *UAS-Rho1-N19*,  $p = 0.187$ ; *control* versus *UAS-Rac1-N17*,  $p = 0.545$ , one-way ANOVA followed by Dunnett's test. In E, *control* versus *UAS-Rho1-DN*,  $p = 0.030$ ; *control* versus *UAS-Rac1-N17*,  $p = 0.998$ , one-way ANOVA followed by Dunnett's test.

(F, G) Quantification of the total dendritic length (F,  $p = 0.16$ ) and the number of branch points outside of sternites (G,  $p = 0.11$ ) in *control* and *UAS-Rho1-N19* neurons. Error bars indicate standard error of the mean. n.s.  $> 0.05$ ; unpaired Student's *t* test.

### **Supplemental Movie S1. Live images of adult C4da dendrites at the segmental boundaries.**

### **Supplemental References**

Barrett K, Leptin M, Settleman J. 1997. The Rho GTPase and a putative RhoGEF mediate a signaling pathway for the cell shape changes in

- Drosophila* gastrulation. *Cell* **91**: 905-915.
- Billuart P, Winter CG, Maresh A, Zhao X, Luo L. 2001. Regulating axon branch stability: the role of p190 RhoGAP in repressing a retraction signaling pathway. *Cell* **107**: 195-207.
- Buff E, Carmena A, Gisselbrecht S, Jiménez F, Michelson AM. 1998. Signalling by the *Drosophila* epidermal growth factor receptor is required for the specification and diversification of embryonic muscle progenitors. *Development* **125**: 2075-2086.
- Callahan CA, Bonkovsky JL, Scully AL, Thomas JB. 1996. derailed is required for muscle attachment site selection in *Drosophila*. *Development* **122**: 2761-2767.
- Chen CM, Struhl G. 1999. Wingless transduction by the Frizzled and Frizzled2 proteins of *Drosophila*. *Development* **126**: 5441-5452.
- Chen Y, Struhl G. 1998. In vivo evidence that Patched and Smoothed constitute distinct binding and transducing components of a Hedgehog receptor complex. *Development* **125**: 4943-4948.
- Cohen ED, Mariol MC, Wallace RM, Weyers J, Kamberov YG, Pradel J, Wilder EL. 2002. DWnt4 regulates cell movement and focal adhesion kinase during *Drosophila* ovarian morphogenesis. *Dev Cell* **2**: 437-448.
- Gubb D, Green C, Huen D, Coulson D, Johnson G, Tree D, Collier S, Roote J. 1999. The balance between isoforms of the prickle LIM domain protein is critical for planar polarity in *Drosophila* imaginal discs. *Genes Dev* **13**: 2315-2327.
- Holbrook S, Finley JK, Lyons EL, Herman TG. 2012. Loss of *syd-1* from R7 neurons disrupts two distinct phases of presynaptic development. *J Neurosci* **32**: 18101-18111.
- Hong W, Mosca TJ, Luo L. 2012. Teneurins instruct synaptic partner matching in an olfactory map. *Nature* **484**: 201-207.
- Inaki M, Yoshikawa S, Thomas JB, Aburatani H, Nose A. 2007. Wnt4 is a local repulsive cue that determines synaptic target specificity. *Curr Biol* **17**: 1574-1579.
- Jones KH, Liu J, Adler, PN. 1996. Molecular analysis of EMS-induced frizzled

- mutations in *Drosophila melanogaster*. *Genetics* **142**: 205-215.
- Kidd T, Brose K, Mitchell KJ, Fetter RD, Tessier-Lavigne M, Goodman CS, Tear G. 1998. Roundabout controls axon crossing of the CNS midline and defines a novel subfamily of evolutionarily conserved guidance receptors. *Cell* **92**: 205–215.
- Kolodziej PA, Timpe LC, Mitchell KJ, Fried SR, Goodman CS, Jan LY, Jan YN. 1996. frazzled encodes a *Drosophila* member of the DCC immunoglobulin subfamily and is required for CNS and motor axon guidance. *Cell* **87**: 197-204.
- Kozopas KM, Samos CH, Nusse R. 1998. DWnt-2, a *Drosophila* Wnt gene required for the development of the male reproductive tract, specifies a sexually dimorphic cell fate. *Genes Dev* **12**: 1155-1165.
- Labrador JP, O'keefe D, Yoshikawa S, McKinnon RD, Thomas JB., Bashaw GJ. 2005. The homeobox transcription factor even-skipped regulates netrin-receptor expression to control dorsal motor-axon projections in *Drosophila*. *Curr Biol* **15**: 1413-1419.
- Lahaye LL, Wouda RR, de Jong AW, Fradkin, LG, Noordermeer, J.N. 2012. WNT5 interacts with the Ryk receptors doughnut and derailed to mediate muscle attachment site selection in *Drosophila melanogaster*. *PLoS One* **7**: e32297.
- McElwain, MA, Ko DC, Gordon MD, Fyrst H, Saba JD, Nusse R. 2011. A suppressor/enhancer screen in *Drosophila* reveals a role for wnt-mediated lipid metabolism in primordial germ cell migration. *PLoS One* **6**: e26993.
- Michelson AM, Gisselbrecht S, Zhou Y, Baek KH, Buff, EM. 1998. Dual functions of the heartless fibroblast growth factor receptor in development of the *Drosophila* embryonic mesoderm. *Dev Genet* **22**: 212-229.
- Neisch AL, Formstecher E, Fehon RG. 2013. Conundrum, an ARHGAP18 orthologue, regulates RhoA and proliferation through interactions with Moesin. *Mol Biol Cell* **24**: 1420-1433.
- Nellen D, Affolter M, Basler K. 1994. Receptor serine/threonine kinases implicated in the control of *Drosophila* body pattern by decapentaplegic. *Cell* **78**: 225-237.

- Nüsslein-Volhard C, Wieschaus E, Kluding H. 1984. Mutations affecting the pattern of the larval cuticle in *Drosophila melanogaster*. *Roux's Arch Dev Biol* **193**: 267-282.
- O'Reilly AM, Ballew AC, Miyazawa B, Stocker H, Hafen E, Simon MA. 2006. Csk differentially regulates Src64 during distinct morphological events in *Drosophila* germ cells. *Development* **133**: 2627-2638.
- Pappu KS, Morey M, Nern A, Spitzweck B, Dickson BJ, Zipursky SL. 2011. Robo-3-mediated repulsive interactions guide R8 axons during *Drosophila* visual system development. *Proc Natl Acad Sci USA* **108**: 7571-7576.
- Perrimon N, Mahowald AP. 1987. Multiple functions of segment polarity genes in *Drosophila*. *Dev Biol* **119**: 587-600.
- Sanny J, Chui V, Langmann C, Pereira C, Zahedi B, Harden N. 2006. *Drosophila* RhoGAP68F is a putative GTPase activating protein for RhoA participating in gastrulation. *Dev Genes Evol* **216**: 543-550.
- Schimmelpfeng K, Gögel S, Klämbt C. 2001. The function of leak and kuzbanian during growth cone and cell migration. *Mech Dev* **106**: 25-36.
- Seeger M, Tear G, Ferres-Marco D, Goodman CS. 1993. Mutations affecting growth cone guidance in *Drosophila*: genes necessary for guidance toward or away from the midline. *Neuron* **10**: 409-426.
- Shindo M, Wada H, Kaido M, Tateno M, Aigaki T, Tsuda L, Hayashi S. 2008. Dual function of Src in the maintenance of adherens junctions during tracheal epithelial morphogenesis. *Development* **135**: 1355-1364.
- Twombly V, Bangi E, Le V, Malnic B, Singer M., Wharton KA. 2009. Functional analysis of saxophone, the *Drosophila* gene encoding the BMP type I receptor ortholog of human ALK1/ACVRL1 and ACVR1/ALK2. *Genetics* **183**: 563-579.
- Wehrli M, Dougan ST, Caldwell K, O'Keefe L, Schwartz S, Vaizel-Ohayon D, Schejter E, Tomlinson A, DiNardo S. 2000. arrow encodes an LDL-receptor-related protein essential for Wingless signalling. *Nature* **407**: 527-530.
- Winberg ML, Mitchell KJ, Goodman CS. 1998. Genetic analysis of the

mechanisms controlling target selection: complementary and combinatorial functions of netrins, semaphorins, and IgCAMs. *Cell* **93**, 581-591.

Wolff T, Rubin GM. 1998. Strabismus, a novel gene that regulates tissue polarity and cell fate decisions in *Drosophila*. *Development* **125**: 1149-1159.

Yoshikawa S, McKinnon RD, Kokel M, Thomas JB. 2003. Wnt-mediated axon guidance via the *Drosophila* Derailed receptor. *Nature* **422**: 583-588.

Zheng X, Wang J, Haerry TE, Wu AY, Martin J, O'Connor MB, Lee CH, Lee T. 2003. TGF-beta signaling activates steroid hormone receptor expression during neuronal remodeling in the *Drosophila* brain. *Cell* **112**: 303-315.



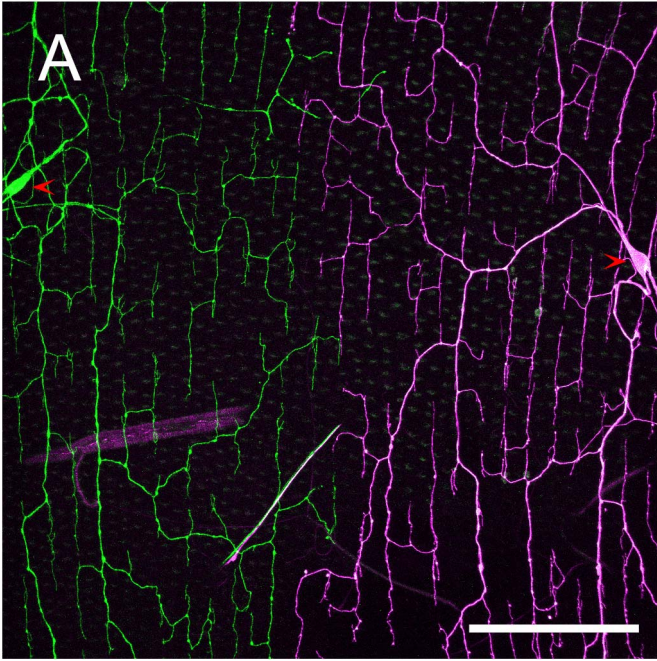

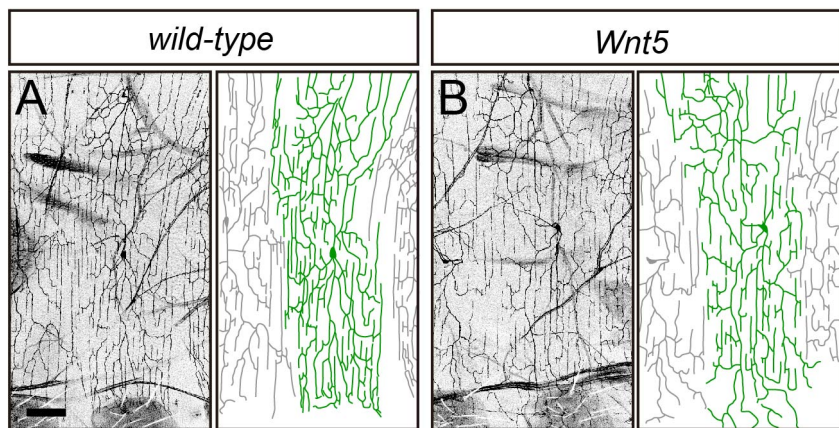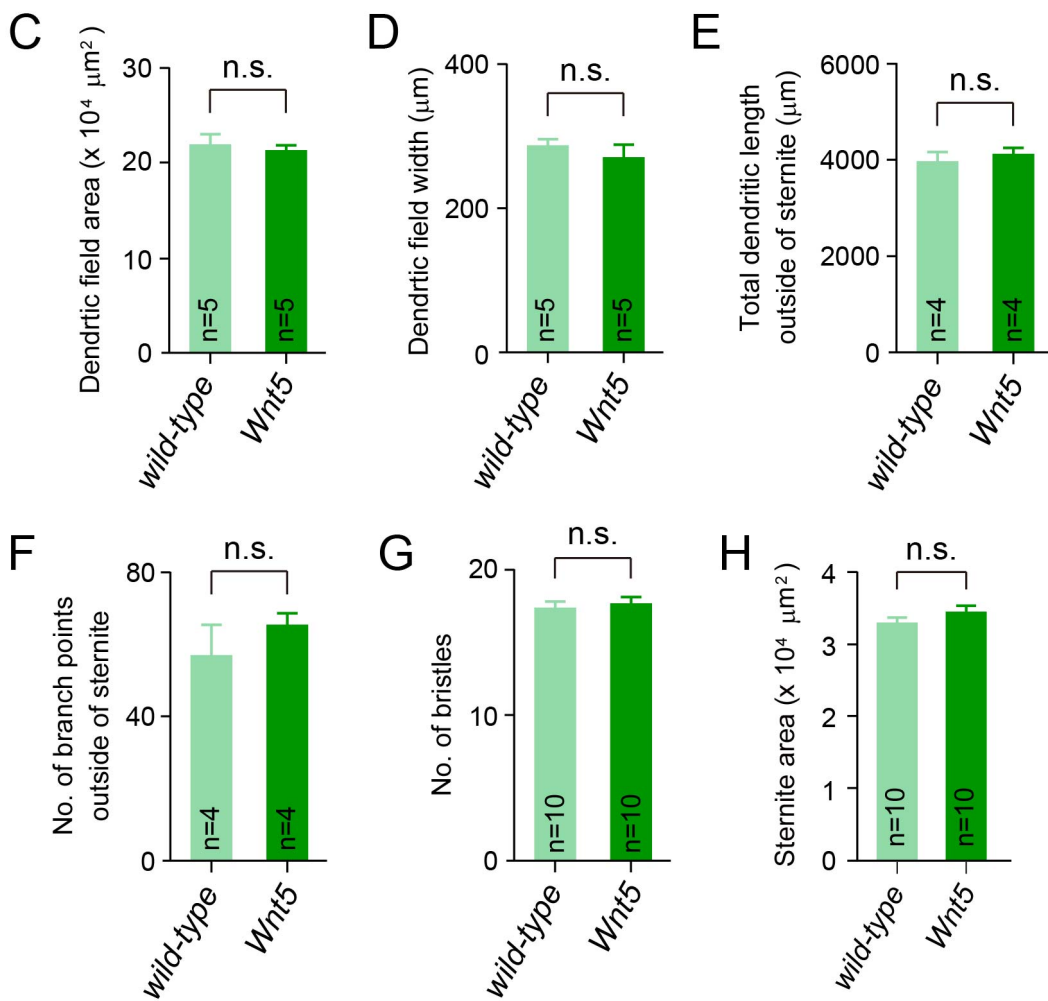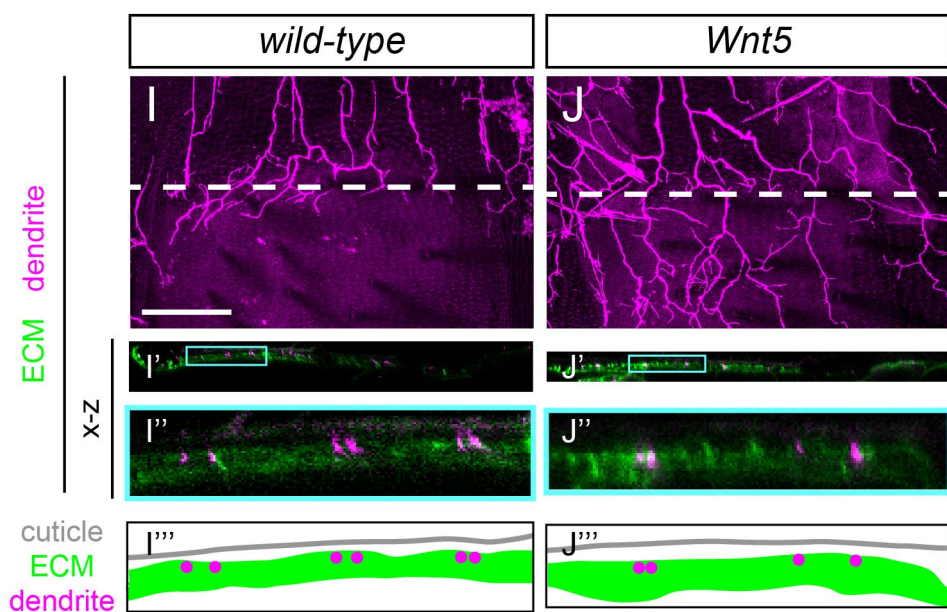

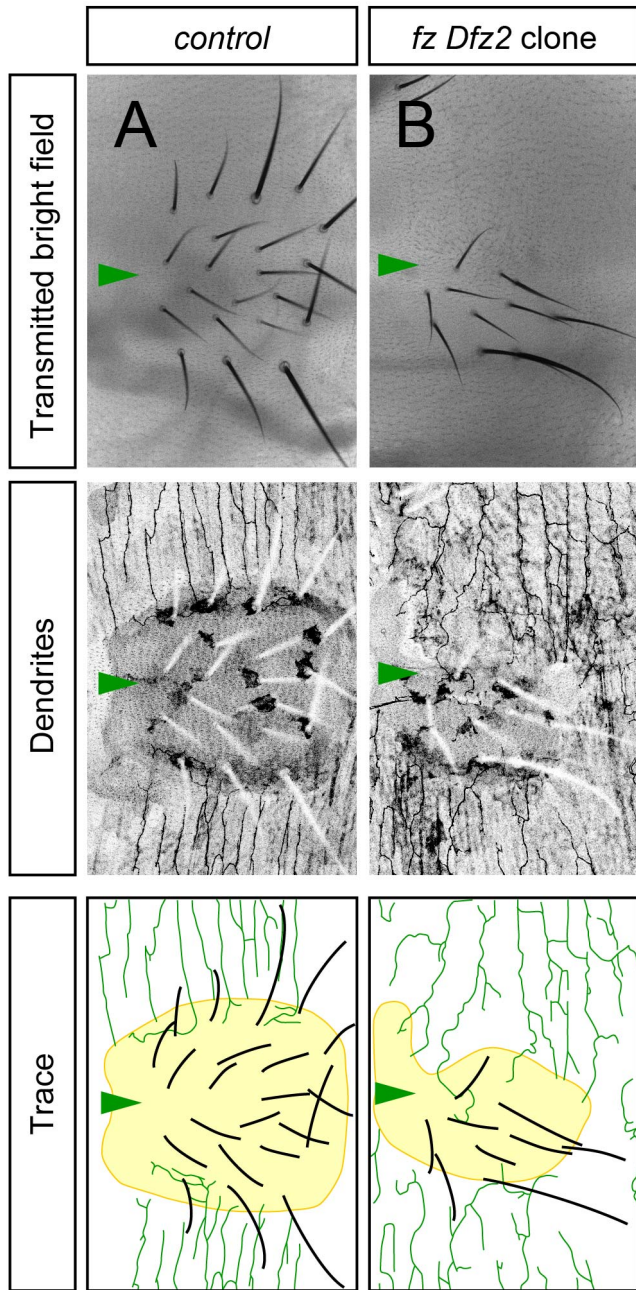

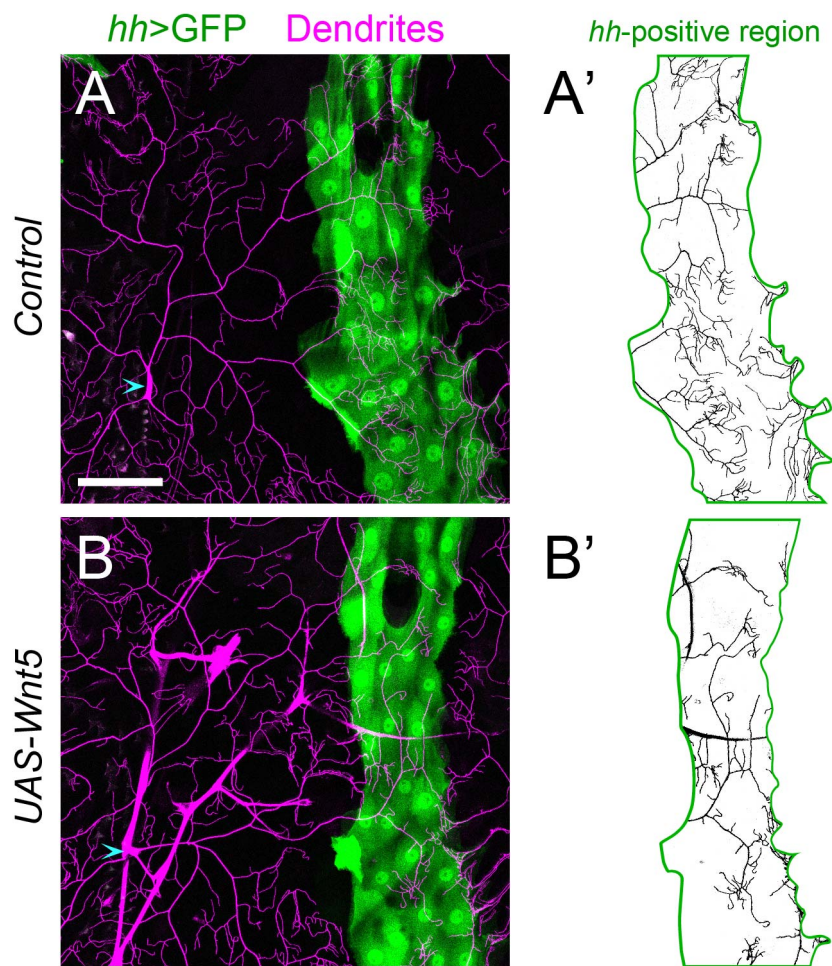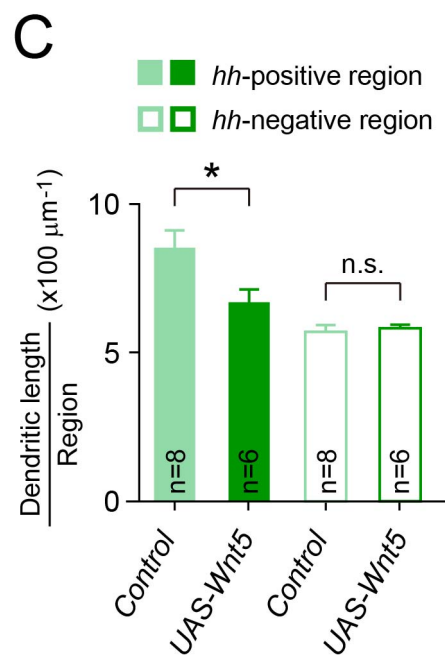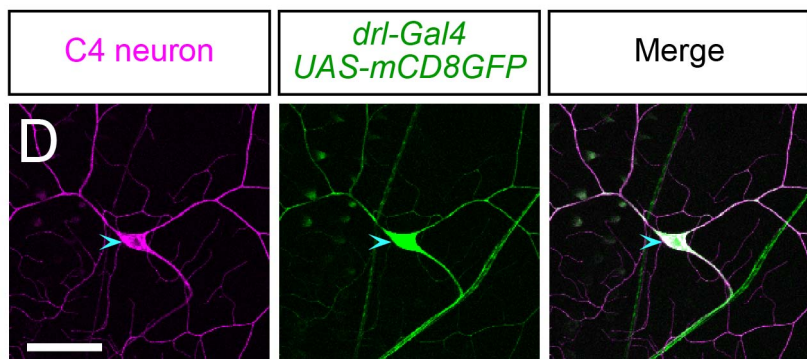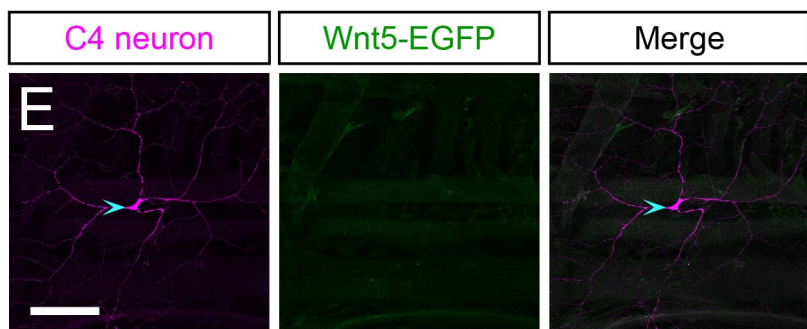

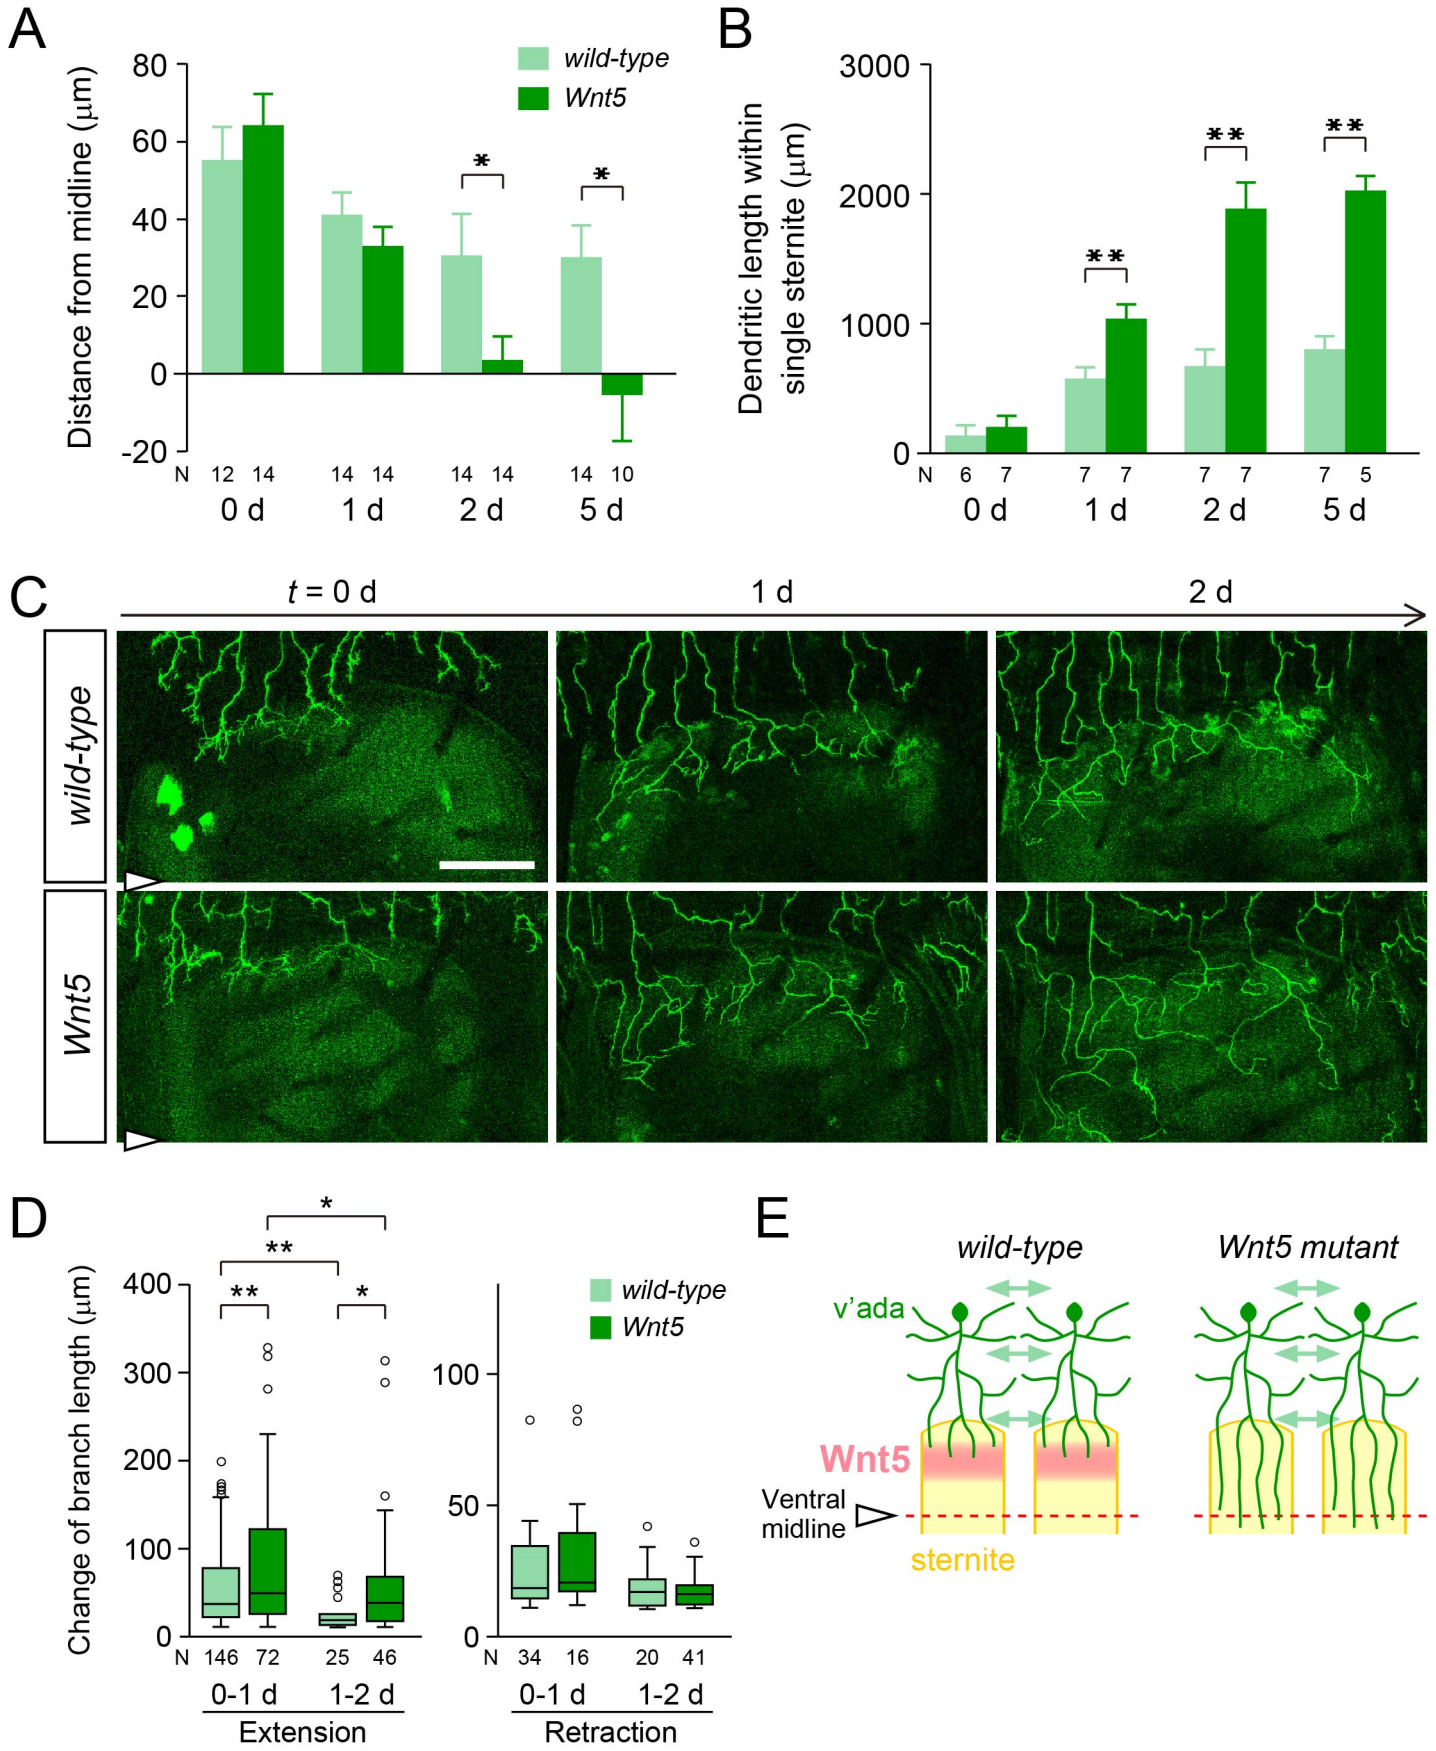

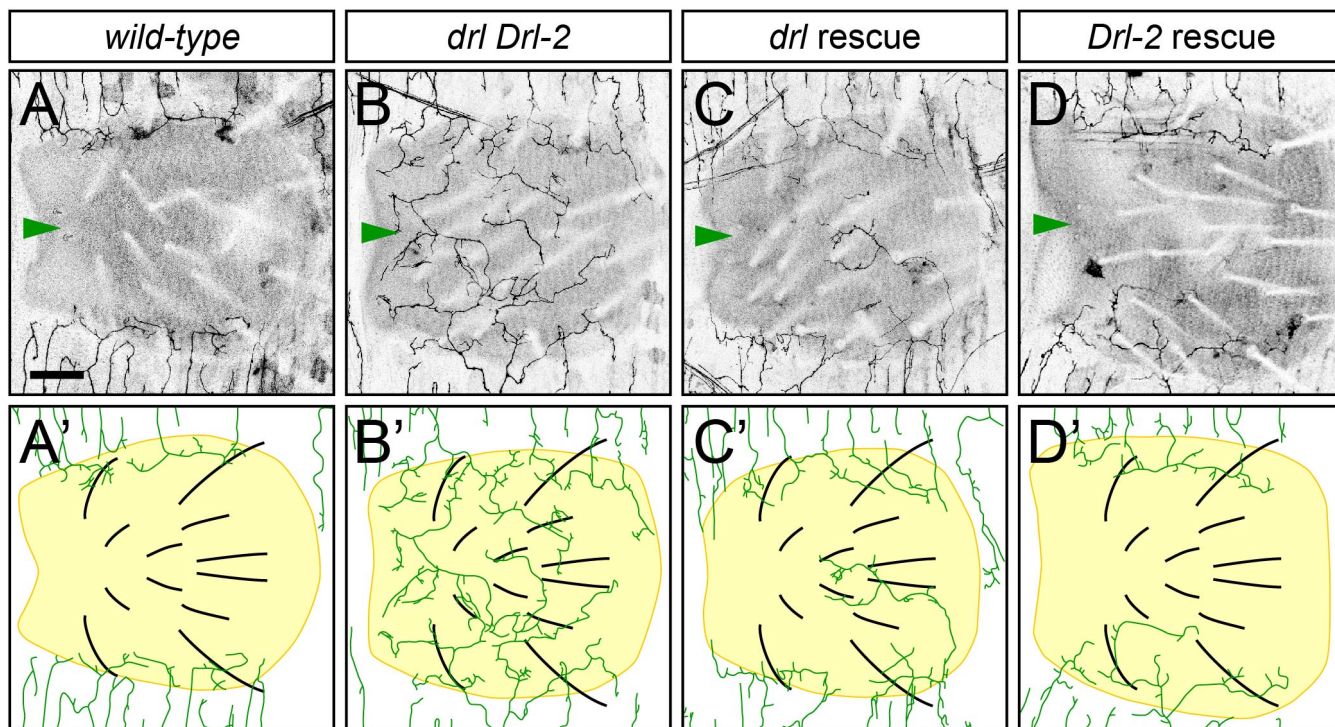

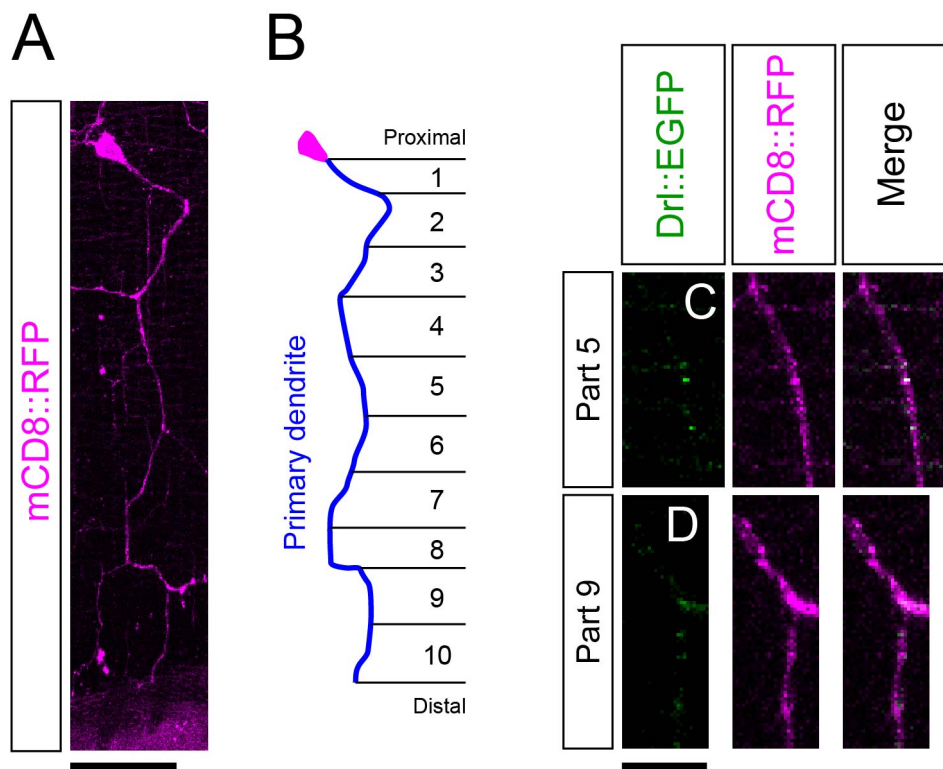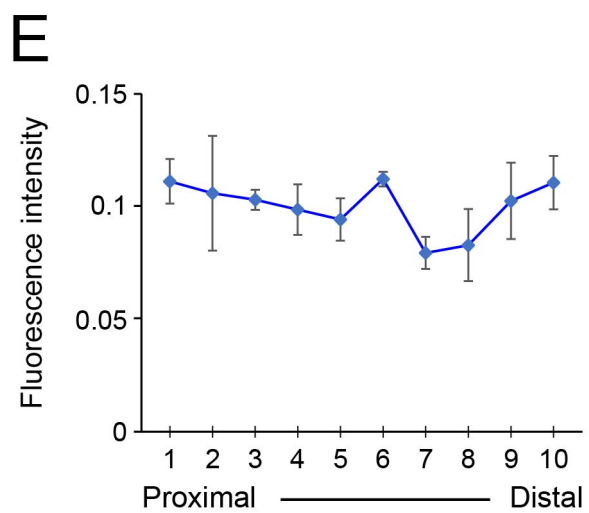

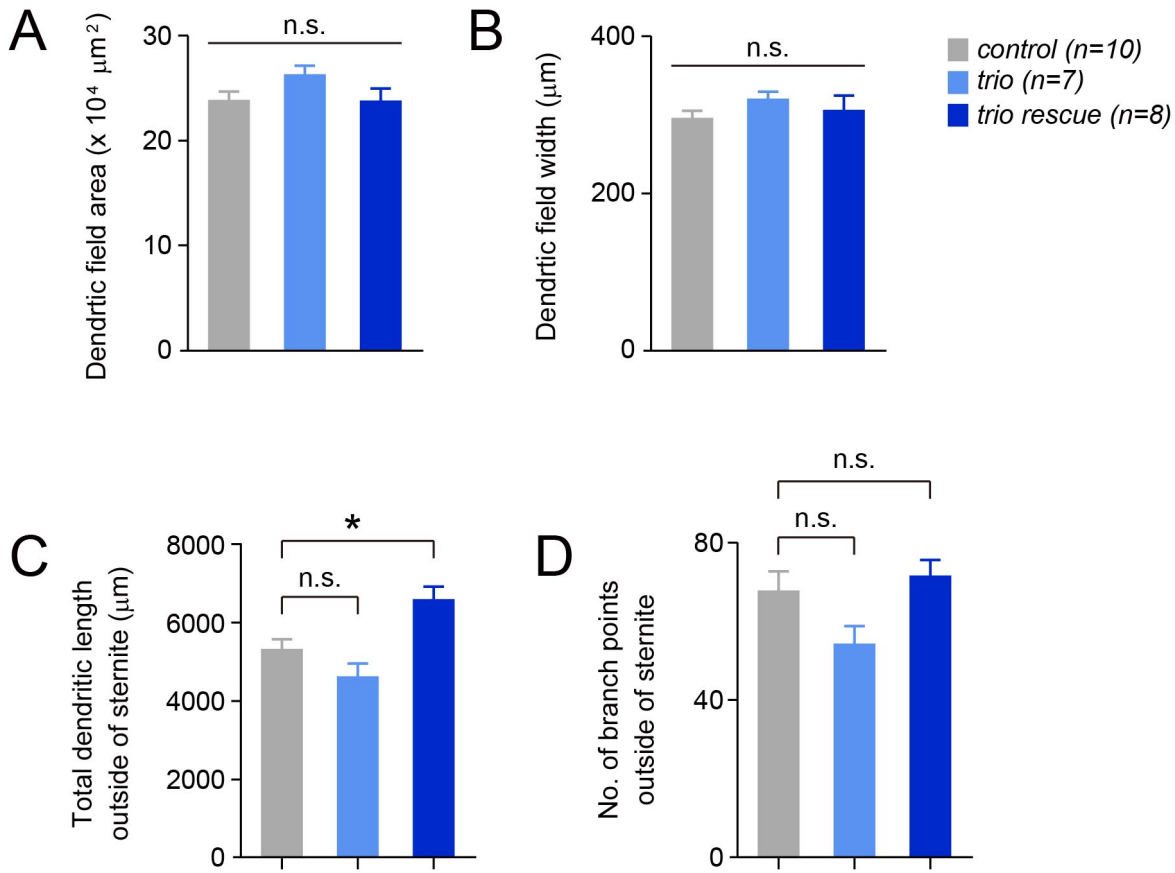



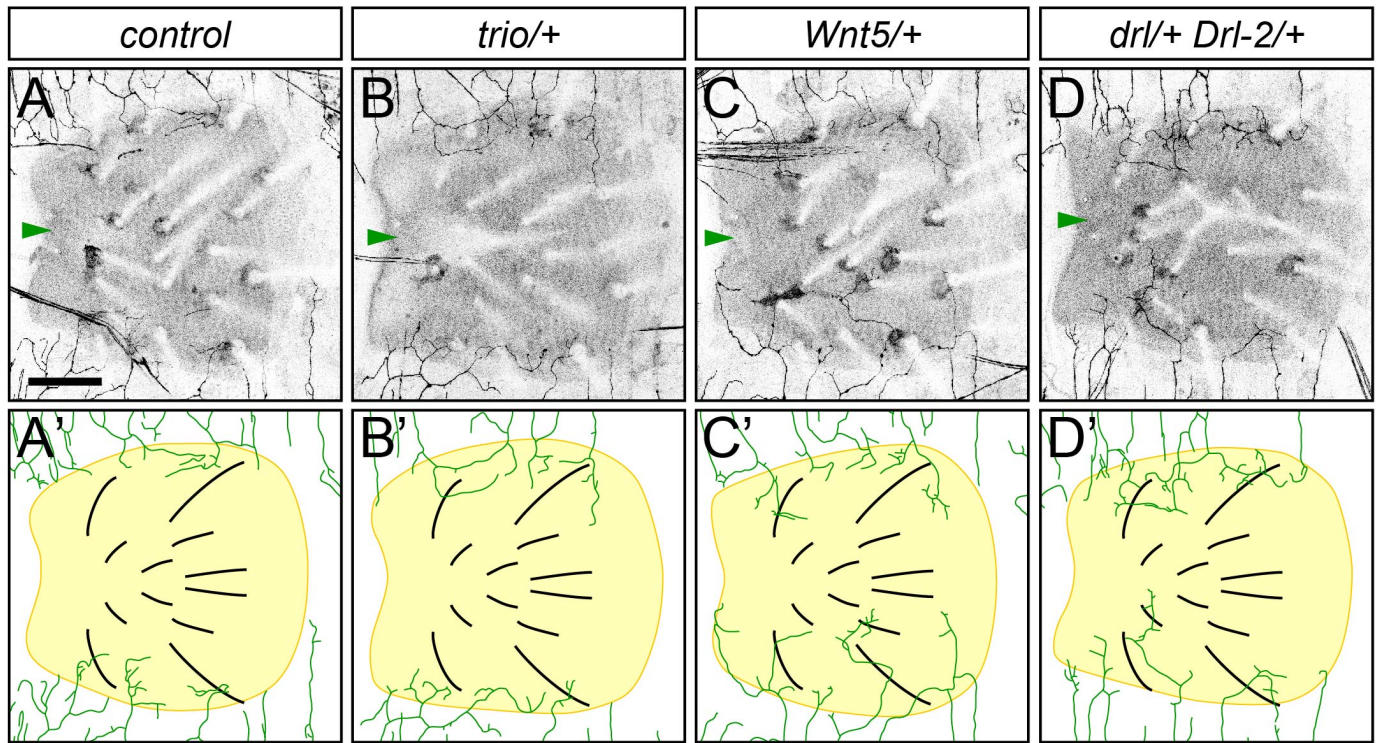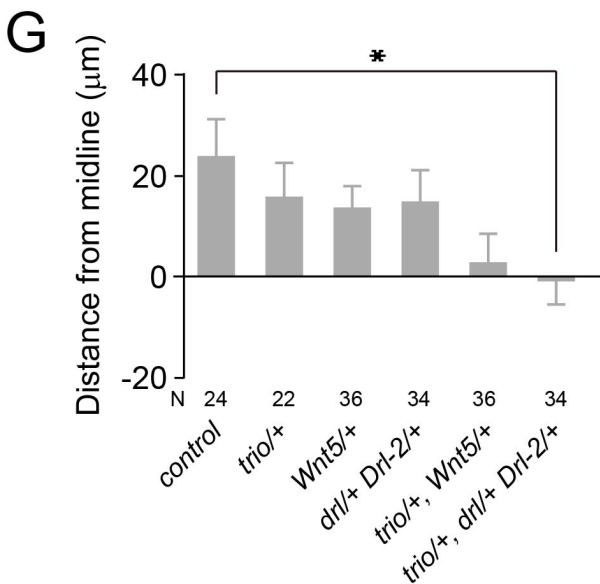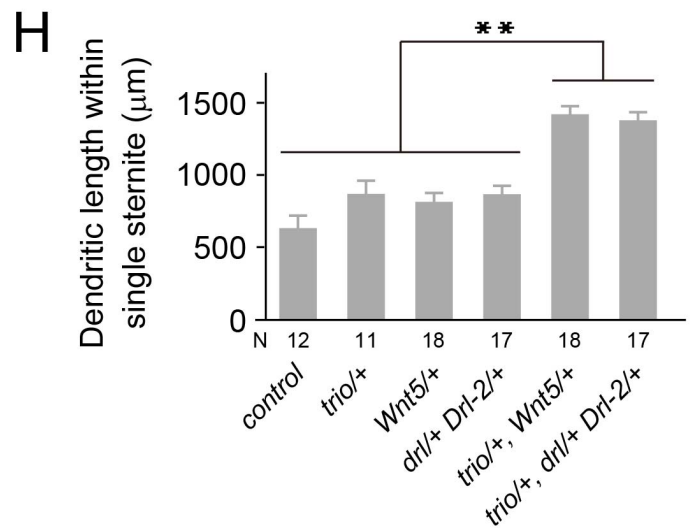

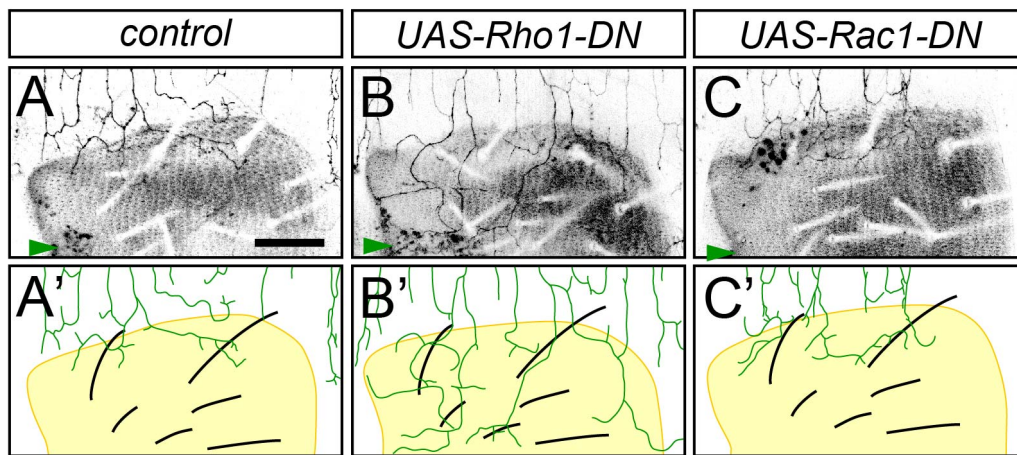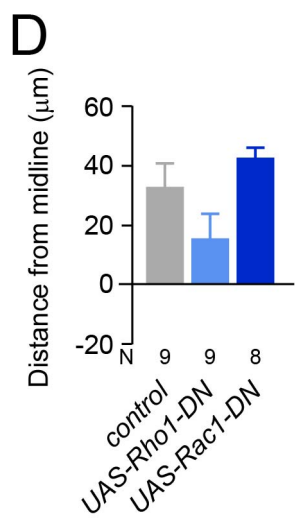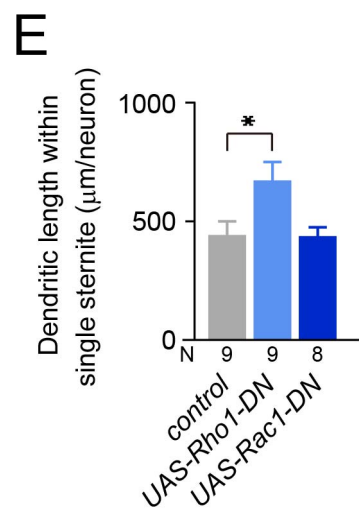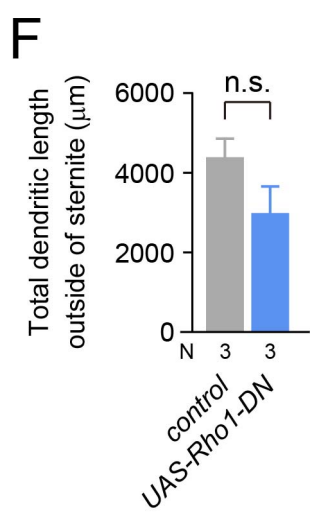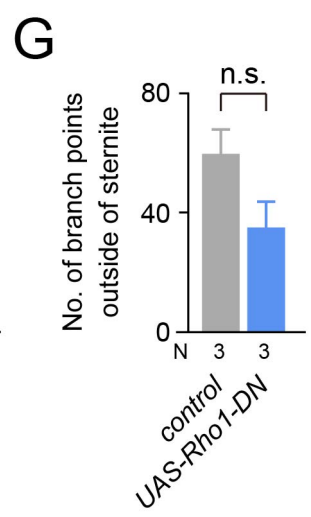

**Supplementary Table S1**  
**Boundary phenotypes of secreted molecules and receptors tested.**

| Gene name                 | Assay used for analysis of boundary formation | Alleles or UAS lines used | Defects in boundary formation <sup>a</sup> | Source                                      |
|---------------------------|-----------------------------------------------|---------------------------|--------------------------------------------|---------------------------------------------|
| <i>Wnt2</i>               | heteroallelic combination                     | <i>O / Df(2R)BSC408</i>   | –                                          | Kozopas et al., 1998                        |
| <i>Wnt4</i>               | heteroallelic combination                     | <i>EMS23 / C1</i>         | –                                          | Cohen et al., 2002                          |
| <i>Wnt5/Wnt3</i>          | homozygote                                    | <i>D7</i>                 | +++                                        | Yoshikawa et al., 2003                      |
| <i>Wnt6</i>               | RNAi <sup>b</sup>                             | <i>BL30493</i>            | –                                          | TRiP line, VALIUM10                         |
| <i>WntD/Wnt8</i>          | RNAi <sup>b</sup>                             | <i>BL28947</i>            | –                                          | TRiP line, VALIUM10                         |
| <i>Wnt10</i>              | RNAi <sup>b</sup>                             | <i>BL31989</i>            | –                                          | TRiP line, VALIUM10                         |
| <i>wg</i>                 | not tested                                    |                           |                                            |                                             |
| <i>fz fz2<sup>c</sup></i> | MARCM                                         | <i>HS1, C1</i>            | –                                          | Jones et al., 1996<br>Chen and Struhl, 1999 |
| <i>fz3</i>                | RNAi <sup>d</sup>                             | <i>BL44468</i>            | –                                          | TRiP, VALIUM22                              |
| <i>fz4</i>                | homozygote                                    | <i>3-1</i>                | –                                          | McElwain et al., 2011                       |
| <i>arr</i>                | MARCM                                         | <i>2</i>                  | –                                          | Wehrli et al., 2000                         |
| <i>Ror</i>                | homozygote                                    | <i>271<sup>e</sup></i>    | –                                          | This study                                  |
| <i>dnt</i>                | homozygote                                    | <i>42.3</i>               | –                                          | Lahaye et al., 2012                         |
| <i>drl</i>                | homozygote                                    | <i>R343</i>               | +                                          | Callahan et al., 1996                       |
| <i>Drl2</i>               | homozygote                                    | <i>E124</i>               | ++                                         | Inaki et al., 2007                          |
| <i>drl Drl2</i>           | homozygote                                    | <i>R343, E124</i>         | +++                                        | Callahan et al., 1996<br>Inaki et al., 2007 |
| <i>NetA NetB</i>          | homozygote                                    | <i>Df(1)T9B118</i>        | –                                          | Winberg et al., 1998                        |
| <i>fra</i>                | heteroallelic combination                     | <i>3 / 4</i>              | –                                          | Kolodziej et al., 1996                      |
| <i>fra</i>                | RNAi <sup>d</sup>                             | <i>BL40826</i>            | –                                          | TRiP line, VALIUM20                         |
| <i>unc-5</i>              | MARCM                                         | <i>8</i>                  | –                                          | Labrador et al., 2005                       |
| <i>Robo</i>               | MARCM                                         | <i>GA285</i>              | +                                          | Kidd et al., 1998                           |
| <i>Robo2</i>              | homozygote                                    | <i>1</i>                  | –                                          | Schimmelpfeng et al., 2001                  |
| <i>Robo3</i>              | homozygote                                    | <i>3</i>                  | –                                          | Pappu et al., 2011                          |
| <i>ephrin</i>             | RNAi <sup>d</sup>                             | <i>BL34614</i>            | +                                          | TRiP line, VALIUM20                         |
| <i>Eph</i>                | RNAi <sup>d</sup>                             | <i>BL39066</i>            | –                                          | TRiP line, VALIUM20                         |
| <i>plexA</i>              | RNAi <sup>d</sup>                             | <i>BL30483</i>            | –                                          | TRiP line, VALIUM10                         |
| <i>plexB</i>              | RNAi <sup>d</sup>                             | <i>BL28911</i>            | –                                          | TRiP line, VALIUM10                         |
| <i>babo</i>               | MARCM                                         | <i>9</i>                  | N.A. <sup>f</sup>                          | Zheng et al., 2003                          |
| <i>tkv</i>                | MARCM                                         | <i>8</i>                  | N.A. <sup>g</sup>                          | Nellen et al., 1994                         |
| <i>sax</i>                | MARCM                                         | <i>4</i>                  | –                                          | Twombly et al., 2009                        |
| <i>put</i>                | RNAi <sup>d</sup>                             | <i>BL39025</i>            | –                                          | TRiP line, VALIUM20                         |
| <i>wit</i>                | RNAi <sup>d</sup>                             | <i>BL41906</i>            | –                                          | TRiP line, VALIUM20                         |
| <i>smo</i>                | MARCM                                         | <i>3</i>                  | +                                          | Chen and Struhl, 1998                       |
| <i>ptc</i>                | MARCM                                         | <i>IIC</i>                | –                                          | Nüsslein-Volhard et al., 1984               |
| <i>ptc</i>                | RNAi <sup>d</sup>                             | <i>BL55686</i>            | –                                          | TRiP line, VALIUM20                         |
| <i>Egfr</i>               | Dominant-negative form <sup>h</sup>           | <i>BL5364</i>             | –                                          | Buff et al., 1998                           |
| <i>btl</i>                | RNAi <sup>d</sup>                             | <i>BL43544</i>            | –                                          | TRiP line, VALIUM20                         |
| <i>htl</i>                | Dominant-negative form <sup>h</sup>           | <i>BL5366</i>             | –                                          | Michelson et al., 1998                      |
| <i>Ten-a</i>              | homozygote                                    | <i>Df(1)Ten-a</i>         | –                                          | Hong et al., 2012                           |
| <i>Ten-a</i>              | RNAi <sup>d</sup>                             | <i>BL29439</i>            | –                                          | TRiP line, VALIUM10                         |
| <i>Ten-m</i>              | RNAi <sup>d</sup>                             | <i>BL29390</i>            | –                                          | TRiP line, VALIUM10                         |

<sup>a</sup>+++ , strong; ++ , moderate; + , weak; – , none

<sup>b</sup>The UAS-RNAi stocks were driven by *tub-GAL4*, *ppk-CD4-tdTomato*.

<sup>c</sup>We generated MARCM clones of C4da neurons doubly mutant for *fz* and *fz2*.

<sup>d</sup>The UAS-RNAi stocks were driven by *ppk-GAL4*, *UAS-mCD8GFP*, *UAS-dcr2*.

<sup>e</sup>*Ror*<sup>271</sup> allele was generated by imprecise excision of the P-element {EP}G8235 inserted upstream of the transcription start site. This allele removes 2.9 kb (genomic region 2L:10,251,809-10,254,702) including the whole *Ror* coding region and a part of the CG5676 3' UTR.

<sup>f</sup>Dendrites were misdirected ventrally in *babo* MARCM clones.

<sup>g</sup>Total dendritic length and dendritic field area were severely reduced.

<sup>h</sup>All UAS-dominant negative stocks were driven by *ppk-GAL4*, *UAS-mCD8GFP*.

At least 3 neurons for each genotype were analyzed.

**Supplementary Table S2**  
**Boundary phenotypes of non-canonical Wnt signaling components tested.**

Yasunaga\_Table S2

| Gene name                          | Assay used for analysis of boundary formation | Alleles or UAS lines used | Defects in boundary formation | Source                      |
|------------------------------------|-----------------------------------------------|---------------------------|-------------------------------|-----------------------------|
| <b>PCP pathway</b>                 |                                               |                           |                               |                             |
| <i>fz</i>                          | MARCM                                         | <i>HS1</i>                | –                             | Jones et al., 1996          |
| <i>dsh</i>                         | RNAi <sup>a</sup>                             | <i>BL31306</i>            | –                             | TRiP line, VALIUM1          |
| <i>dsh</i>                         | homozygote                                    | <i>1</i>                  | –                             | Perrimon and Mahowald, 1987 |
| <i>Vang</i>                        | RNAi <sup>a</sup>                             | <i>BL34354</i>            | –                             | TRiP line, VALIUM20         |
| <i>Vang</i>                        | homozygote                                    | <i>stbm-6</i>             | –                             | Wolff and Rubin, 1998       |
| <i>pk</i>                          | RNAi <sup>a</sup>                             | <i>BL32413</i>            | –                             | TRiP line, VALIUM20         |
| <i>pk</i>                          | homozygote                                    | <i>sple</i>               | +                             | Gubb et al., 1999           |
| <i>pk</i>                          | homozygote                                    | <i>pk</i>                 | –                             | Gubb et al., 1999           |
| <i>pk</i>                          | MARCM                                         | <i>pk-sple-13</i>         | –                             | Gubb et al., 1999           |
| <i>fmi</i>                         | RNAi <sup>a</sup>                             | <i>BL35050</i>            | –                             | TRiP line, VALIUM20         |
| <i>dgo</i>                         | RNAi <sup>a</sup>                             | <i>BL35040</i>            | –                             | TRiP line, VALIUM20         |
| <b>Src pathway</b>                 |                                               |                           |                               |                             |
| <i>Src42A</i>                      | RNAi <sup>a</sup>                             | <i>BL44039</i>            | –                             | TRiP line, VALIUM20         |
| <i>Src42A</i>                      | Dominant-negative form <sup>c</sup>           | <i>KYOTO109998</i>        | N.A. <sup>b</sup>             | Shindo et al., 2008         |
| <i>Src64B</i>                      | homozygote                                    | <i>KO</i>                 | –                             | O'Reilly et al., 2006       |
| <b>Wnt-Ca<sup>2+</sup> pathway</b> |                                               |                           |                               |                             |
| <i>CamKI</i>                       | RNAi <sup>a</sup>                             | <i>BL26726</i>            | –                             | TRiP line, VALIUM10         |
| <i>CamKII</i>                      | RNAi <sup>a</sup>                             | <i>BL29401</i>            | –                             | TRiP line, VALIUM10         |
| <i>sl(PLCgamma)</i>                | RNAi <sup>a</sup>                             | <i>BL32385</i>            | –                             | TRiP line, VALIUM20         |
| <i>PLC21C</i>                      | RNAi <sup>a</sup>                             | <i>BL33719</i>            | –                             | TRiP line, VALIUM20         |
| <i>norpA(PLCbeta)</i>              | RNAi <sup>a</sup>                             | <i>BL31197</i>            | –                             | TRiP line, VALIUM1          |
| <i>bsk(JNK)</i>                    | RNAi <sup>a</sup>                             | <i>BL32977</i>            | –                             | TRiP line, VALIUM20         |
| <i>bsk(JNK)</i>                    | Dominant-negative form <sup>c</sup>           | <i>BL6409</i>             | –                             | Bloomington                 |

<sup>a</sup>The UAS-RNAi stocks were driven by *ppk-GAL4*, *UAS-mCD8GFP*, *UAS-dcr2*.

<sup>b</sup>Total dendritic length and dendritic field area were severely reduced.

<sup>c</sup>The UAS-dominant-negative transgene was driven by *ppk-GAL4*, *UAS-mCD8GFP*.

+, weak; -, none

At least 3 neurons for each genotype were analyzed.

**Supplementary Table S3**  
Boundary phenotypes of RhoGEFs and RhoGAPs tested.

Yasunaga\_Table S3

| Gene name     | Assay used for analysis of boundary formation | Alleles or UAS lines used | Defects in boundary formation | Source                |
|---------------|-----------------------------------------------|---------------------------|-------------------------------|-----------------------|
| <b>RhoGAP</b> |                                               |                           |                               |                       |
| syd-1         | RNAi <sup>a</sup>                             | BL32946                   | +                             | TRiP line, VALIUM20   |
| syd-1         | heteroallelic combination                     | CD / W46                  | -                             | Holbrook et al., 2012 |
| RhoGAP102A    | RNAi <sup>a</sup>                             | BL33425                   | -                             | TRiP line, VALIUM20   |
| RhoGAP15B     | RNAi <sup>a</sup>                             | BL42527                   | N.A. <sup>b</sup>             | TRiP line, VALIUM20   |
| RhoGAP16F     | RNAi <sup>a</sup>                             | BL42541                   | -                             | TRiP line, VALIUM20   |
| RhoGAP19D     | RNAi <sup>a</sup>                             | BL32361                   | -                             | TRiP line, VALIUM20   |
| RhoGAP54D     | RNAi <sup>a</sup>                             | BL31144                   | -                             | TRiP line, VALIUM1    |
| RhoGAP5A      | RNAi <sup>a</sup>                             | BL31163                   | -                             | TRiP line, VALIUM1    |
| RhoGAP68F     | RNAi <sup>a</sup>                             | BL41990                   | +                             | TRiP line, VALIUM20   |
| RhoGAP68F     | homozygote                                    | EY05896                   | -                             | Sanny et al., 2006    |
| RhoGAP71E     | RNAi <sup>a</sup>                             | BL32417                   | -                             | TRiP line, VALIUM20   |
| drich         | RNAi <sup>a</sup>                             | BL33391                   | -                             | TRiP line, VALIUM20   |
| Vilse         | RNAi <sup>a</sup>                             | BL35027                   | -                             | TRiP line, VALIUM20   |
| RhoGAPp190    | RNAi <sup>a</sup>                             | BL31070                   | -                             | TRiP line, VALIUM1    |
| tum           | RNAi <sup>a</sup>                             | BL35007                   | -                             | TRiP line, VALIUM20   |
| CdGAPr        | RNAi <sup>a</sup>                             | BL38279                   | -                             | TRiP line, VALIUM20   |
| Ocr1          | RNAi <sup>a</sup>                             | BL34722                   | -                             | TRiP line, VALIUM20   |
| RhoGAP18B     | RNAi <sup>a</sup>                             | BL31165                   | -                             | TRiP line, VALIUM20   |
| Graf          | RNAi <sup>a</sup>                             | BL31692                   | -                             | TRiP line, VALIUM1    |
| cv-c          | RNAi <sup>a</sup>                             | BL6443                    | -                             | Billuart et al., 2001 |
| RacGAP84C     | not tested                                    |                           |                               |                       |
| conu          | homozygote                                    | LL04815                   | -                             | Neisch et al., 2013   |
| Rlip          | homozygote                                    | c02656                    | -                             | Bloomington           |
| <b>RhoGEF</b> |                                               |                           |                               |                       |
| Sos           | RNAi <sup>a</sup>                             | BL34833                   | -                             | TRiP line, VALIUM20   |
| RtGEF         | RNAi <sup>a</sup>                             | BL32947                   | -                             | TRiP line, VALIUM20   |
| CG10188       | RNAi <sup>a</sup>                             | BL33047                   | -                             | TRiP line, VALIUM20   |
| CG42674       | RNAi <sup>a</sup>                             | BL34943                   | -                             | TRiP line, VALIUM20   |
| Exn           | RNAi <sup>a</sup>                             | BL33373                   | -                             | TRiP line, VALIUM20   |
| GEFmeso       | RNAi <sup>a</sup>                             | BL42545                   | -                             | TRiP line, VALIUM20   |
| Trio          | RNAi <sup>a</sup>                             | BL43549                   | ++                            | TRiP line, VALIUM20   |
| Trio          | MARCM                                         | E4.1                      | ++                            | Awasaki et al., 2000  |
| Unc-89        | RNAi <sup>a</sup>                             | BL34000                   | -                             | TRiP line, VALIUM20   |
| Vav           | RNAi <sup>a</sup>                             | BL39059                   | -                             | TRiP line, VALIUM20   |
| CG43658       | RNAi <sup>a</sup>                             | BL32341                   | -                             | TRiP line, VALIUM20   |
| CG30456       | RNAi <sup>a</sup>                             | BL34380                   | -                             | TRiP line, VALIUM20   |
| pbl           | RNAi <sup>a</sup>                             | BL28343                   | -                             | TRiP line, VALIUM10   |
| sif           | RNAi <sup>a</sup>                             | BL25789                   | -                             | TRiP line, VALIUM10   |
| Zir           | RNAi <sup>a</sup>                             | BL28005                   | -                             | TRiP line, VALIUM10   |
| Cdep          | RNAi <sup>a</sup>                             | BL31168                   | -                             | TRiP line, VALIUM1    |
| CG15611       | RNAi <sup>a</sup>                             | BL31158                   | -                             | TRiP line, VALIUM1    |
| CG30440       | RNAi <sup>a</sup>                             | BL31207                   | -                             | TRiP line, VALIUM1    |
| CG33275       | RNAi <sup>a</sup>                             | BL31221                   | -                             | TRiP line, VALIUM1    |
| CG7397        | RNAi <sup>a</sup>                             | 7397R-1                   | -                             | NIG-FLY               |
| CG7397        | RNAi <sup>a</sup>                             | 7397R-2                   | +                             | NIG-FLY               |
| RhoGAP1A      | RNAi <sup>a</sup>                             | BL33390                   | -                             | TRiP line, VALIUM20   |
| RhoGEF2       | RNAi <sup>a</sup>                             | BL34643                   | +                             | TRiP line, VALIUM20   |
| RhoGEF2       | MARCM                                         | 4.1                       | -                             | Barrett et al., 1997  |
| RhoGEF3       | RNAi <sup>a</sup>                             | BL42526                   | -                             | TRiP line, VALIUM20   |
| RhoGEF4       | RNAi <sup>a</sup>                             | BL42550                   | +                             | TRiP line, VALIUM20   |
| RhoGEF4       | RNAi <sup>a</sup>                             | BL31178                   | -                             | TRiP line, VALIUM1    |
| RhoGEF4       | RNAi <sup>a</sup>                             | 8606R-1                   | -                             | NIG-FLY               |
| RhoGEF4       | RNAi <sup>a</sup>                             | 8606R-2                   | -                             | NIG-FLY               |
| RhoGEF64C     | RNAi <sup>a</sup>                             | BL31130                   | -                             | TRiP line, VALIUM1    |

<sup>a</sup>The UAS-RNAi stocks were driven by *ppk-GAL4*, *UAS-mCD8GFP*, *UAS-dcr2*.

<sup>b</sup>vC4da neurons did not survive to the adult stage.

++, moderate; +, weak; -, none

At least 3 neurons for each genotype were analyzed.
